# Supplementary material for: Thyroid hormones induce browning of white fat
Source: PubMed Central journal article supplement (PMC5292977; doi:10.1530/joe-16-0425), 2016-12-02

**Suppl. Figure 1**  
(Martínez-Sánchez et al)

**A**

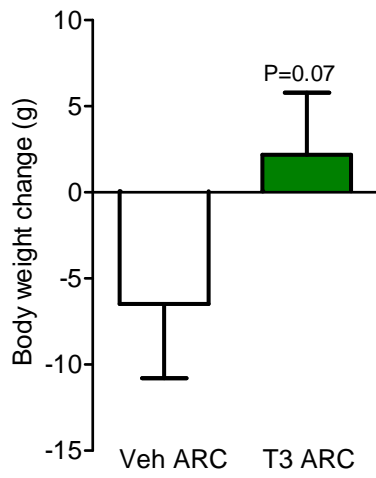

**B**

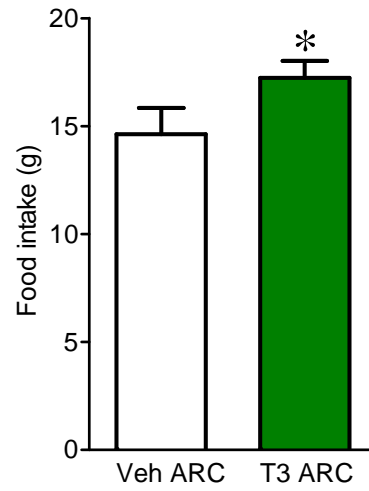

**C**

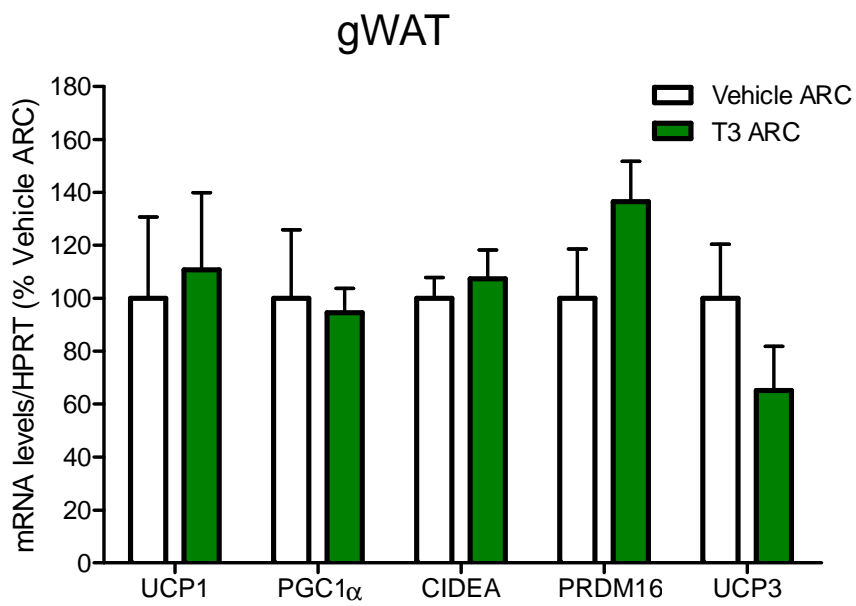

Supplement: joe-232-351-s001.pdf [file joe-232-351-s001.pdf]
