# Supplementary material for: Thyroid hormones induce browning of white fat
Source: PubMed Central journal article supplement (PMC5292977; doi:10.1530/joe-16-0425), 2016-12-02
Supplement: joe-232-351-t001.pdf [file joe-232-351-t001.pdf]

**Supplemental Table 1.** Primers and probes for real-time PCR (TaqMan®) analysis.

| mRNA                           | GenBank          |           | Sequence                                                              |
|--------------------------------|------------------|-----------|-----------------------------------------------------------------------|
|                                | Accession Number |           |                                                                       |
| <b>CIDEA</b>                   | NM_001170467.1   | Assay ID  | ThermoFisher TaqMan® Gene Expression Assays<br>Assay ID Rn04181355_m1 |
| <b>HPRT</b>                    | NM_012583        | Fw Primer | 5'-AGCCGACCGGTTCTGTCAT-3'                                             |
|                                |                  | Rv Primer | 5'-GGTCATAACCTGGTTCATCATCAC -3'                                       |
|                                |                  | Probe     | FAM-5'- CGACCCTCAGTCCCAGCGTCGTGAT 3'-TAMRA                            |
| <b>PGC1<math>\alpha</math></b> | NM_031347        | Fw Primer | 5'-CGATCACCATATTCCAGGTCAAG-3'                                         |
|                                |                  | Rv Primer | 5'-CGATGTGTGCGGTGTCTGTAGT -3'                                         |
|                                |                  | Probe     | FAM-5'-AGGTCCCCAGGCAGTAGATCCTCTTCAAGA -3'-TAMRA                       |
| <b>PRDM16</b>                  | XM_008764418.1   | Assay ID  | ThermoFisher TaqMan® Gene Expression Assays<br>Assay ID Mm01266512_m1 |
| <b>UCP1</b>                    | NM_012682        | Fw Primer | 5'-CAA TGA CCA TGT ACA CCA AGG AA-3'                                  |
|                                |                  | Rv Primer | 5'-GAT CCG AGT CGC AGA AAA GAA-3'                                     |
|                                |                  | Probe     | FAM-5'-ACC GGC AGC CTT TTT CAA AGG GTT TG-3'-TAMRA                    |
| <b>UCP3</b>                    | NM_003356.3      | Assay ID  | ThermoFisher TaqMan® Gene Expression Assays<br>Assay ID Rn00565874_m1 |
